# Supplementary material
Source: MDPI journal article supplement (https://www.mdpi.com/2311-5637/9/1/35)
Supplement: s1 [file s1]

## Supplementary Materials

**Table S1.** FCC design matrix for Isop/Hex and observed response.

| Run | Factor X <sub>A</sub><br>polar/non polar<br>ratio | Factor X <sub>B</sub><br>Time<br>(Vortex)<br>(h) | Factor X <sub>C</sub><br>dry biomass/solvent<br>ratio<br>(mg/mL) | Response Y <sub>1</sub><br>Lipids/Dry Biomass<br>(L/DB)<br>(g/g) |
|-----|---------------------------------------------------|--------------------------------------------------|------------------------------------------------------------------|------------------------------------------------------------------|
| 1   | 1                                                 | 0.5                                              | 10                                                               | 0.06                                                             |
| 2   | 1                                                 | 0.5                                              | 70                                                               | 0.06                                                             |
| 3   | 0                                                 | 0.5                                              | 70                                                               | 0.03                                                             |
| 4   | 1                                                 | 3                                                | 10                                                               | 0.1                                                              |
| 5   | 0.5                                               | 3                                                | 40                                                               | 0.05                                                             |
| 6   | 1                                                 | 0.5                                              | 10                                                               | 0.06                                                             |
| 7   | 0                                                 | 3                                                | 10                                                               | 0.07                                                             |
| 8   | 0                                                 | 3                                                | 10                                                               | 0.08                                                             |
| 9   | 0.5                                               | 0.5                                              | 40                                                               | 0.05                                                             |
| 10  | 0.5                                               | 1.75                                             | 70                                                               | 0.04                                                             |
| 11  | 1                                                 | 1.75                                             | 40                                                               | 0.05                                                             |
| 12  | 0                                                 | 1.75                                             | 40                                                               | 0.04                                                             |
| 13  | 1                                                 | 0.5                                              | 10                                                               | 0.06                                                             |
| 14  | 0.5                                               | 1.75                                             | 10                                                               | 0.06                                                             |
| 15  | 1                                                 | 3                                                | 70                                                               | 0.05                                                             |
| 16  | 0                                                 | 1.75                                             | 40                                                               | 0.04                                                             |
| 17  | 0.5                                               | 1.75                                             | 10                                                               | 0.07                                                             |
| 18  | 1                                                 | 0.5                                              | 70                                                               | 0.06                                                             |
| 19  | 0                                                 | 0.5                                              | 70                                                               | 0.03                                                             |
| 20  | 0.5                                               | 0.5                                              | 40                                                               | 0.05                                                             |
| 21  | 0.5                                               | 1.75                                             | 40                                                               | 0.07                                                             |
| 22  | 0.5                                               | 3                                                | 40                                                               | 0.05                                                             |
| 23  | 0                                                 | 0.5                                              | 10                                                               | 0.04                                                             |
| 24  | 0.5                                               | 1.75                                             | 40                                                               | 0.05                                                             |
| 25  | 0                                                 | 0.5                                              | 70                                                               | 0.02                                                             |
| 26  | 1                                                 | 1.75                                             | 40                                                               | 0.05                                                             |
| 27  | 1                                                 | 3                                                | 70                                                               | 0.06                                                             |
| 28  | 1                                                 | 1.75                                             | 40                                                               | 0.06                                                             |
| 29  | 0                                                 | 1.75                                             | 40                                                               | 0.05                                                             |
| 30  | 0.5                                               | 1.75                                             | 40                                                               | 0.05                                                             |
| 31  | 0.5                                               | 3                                                | 40                                                               | 0.04                                                             |
| 32  | 0                                                 | 0.5                                              | 10                                                               | 0.04                                                             |
| 33  | 0                                                 | 3                                                | 70                                                               | 0.03                                                             |
| 34  | 0                                                 | 3                                                | 70                                                               | 0.03                                                             |
| 35  | 1                                                 | 3                                                | 70                                                               | 0.06                                                             |
| 36  | 1                                                 | 3                                                | 10                                                               | 0.1                                                              |
| 37  | 1                                                 | 0.5                                              | 70                                                               | 0.04                                                             |
| 38  | 0                                                 | 3                                                | 70                                                               | 0.02                                                             |
| 39  | 0                                                 | 3                                                | 10                                                               | 0.07                                                             |
| 40  | 0.5                                               | 1.75                                             | 70                                                               | 0.04                                                             |
| 41  | 1                                                 | 3                                                | 10                                                               | 0.1                                                              |
| 42  | 0.5                                               | 0.5                                              | 40                                                               | 0.04                                                             |
| 43  | 0                                                 | 0.5                                              | 10                                                               | 0.03                                                             |

|    |     |      |    |      |
|----|-----|------|----|------|
| 44 | 0.5 | 1.75 | 10 | 0.07 |
| 45 | 0.5 | 1.75 | 70 | 0.04 |

**Table S2.** FCC design matrix for MeOH/AcOEt and observed response.

| Run | Factor X <sub>A</sub><br>polar/non polar<br>ratio | Factor X <sub>B</sub><br>Time<br>(Vortex)<br>(h) | Factor X <sub>C</sub><br>dry biomass/solvent<br>ratio<br>(mg/mL) | Response Y <sub>1</sub><br>L/DB<br>(g/g) |
|-----|---------------------------------------------------|--------------------------------------------------|------------------------------------------------------------------|------------------------------------------|
| 1   | 0.5                                               | 1.75                                             | 70                                                               | 0.07                                     |
| 2   | 1                                                 | 0.5                                              | 70                                                               | 0.05                                     |
| 3   | 0.5                                               | 3                                                | 40                                                               | 0.09                                     |
| 4   | 1                                                 | 3                                                | 70                                                               | 0.06                                     |
| 5   | 0.5                                               | 1.75                                             | 70                                                               | 0.08                                     |
| 6   | 1                                                 | 0.5                                              | 70                                                               | 0.05                                     |
| 7   | 0                                                 | 0.5                                              | 70                                                               | 0.05                                     |
| 8   | 0                                                 | 0.5                                              | 10                                                               | 0.05                                     |
| 9   | 0.5                                               | 1.75                                             | 40                                                               | 0.09                                     |
| 10  | 0                                                 | 3                                                | 10                                                               | 0.06                                     |
| 11  | 0                                                 | 1.75                                             | 40                                                               | 0.07                                     |
| 12  | 0.5                                               | 1.75                                             | 10                                                               | 0.11                                     |
| 13  | 1                                                 | 1.75                                             | 40                                                               | 0.07                                     |
| 14  | 1                                                 | 3                                                | 70                                                               | 0.05                                     |
| 15  | 1                                                 | 3                                                | 10                                                               | 0.09                                     |
| 16  | 0.5                                               | 0.5                                              | 40                                                               | 0.07                                     |
| 17  | 0                                                 | 0.5                                              | 70                                                               | 0.04                                     |
| 18  | 1                                                 | 0.5                                              | 70                                                               | 0.05                                     |
| 19  | 0                                                 | 0.5                                              | 70                                                               | 0.05                                     |
| 20  | 1                                                 | 3                                                | 10                                                               | 0.09                                     |
| 21  | 0                                                 | 3                                                | 10                                                               | 0.07                                     |
| 22  | 0.5                                               | 0.5                                              | 40                                                               | 0.07                                     |
| 23  | 1                                                 | 1.75                                             | 40                                                               | 0.08                                     |
| 24  | 1                                                 | 3                                                | 10                                                               | 0.09                                     |
| 25  | 0.5                                               | 3                                                | 40                                                               | 0.09                                     |
| 26  | 1                                                 | 0.5                                              | 10                                                               | 0.08                                     |
| 27  | 0.5                                               | 1.75                                             | 70                                                               | 0.08                                     |
| 28  | 0.5                                               | 3                                                | 40                                                               | 0.07                                     |
| 29  | 0                                                 | 3                                                | 70                                                               | 0.04                                     |
| 30  | 0.5                                               | 1.75                                             | 10                                                               | 0.11                                     |
| 31  | 0                                                 | 1.75                                             | 40                                                               | 0.07                                     |
| 32  | 0                                                 | 3                                                | 70                                                               | 0.05                                     |
| 33  | 0                                                 | 3                                                | 70                                                               | 0.05                                     |
| 34  | 1                                                 | 0.5                                              | 10                                                               | 0.08                                     |
| 35  | 0.5                                               | 1.75                                             | 40                                                               | 0.1                                      |
| 36  | 0                                                 | 0.5                                              | 10                                                               | 0.06                                     |
| 37  | 0                                                 | 3                                                | 10                                                               | 0.06                                     |
| 38  | 0.5                                               | 0.5                                              | 40                                                               | 0.07                                     |
| 39  | 0                                                 | 0.5                                              | 10                                                               | 0.06                                     |
| 40  | 1                                                 | 1.75                                             | 40                                                               | 0.06                                     |
| 41  | 0.5                                               | 1.75                                             | 10                                                               | 0.11                                     |

|    |     |      |    |      |
|----|-----|------|----|------|
| 42 | 1   | 3    | 70 | 0.05 |
| 43 | 0.5 | 1.75 | 40 | 0.09 |
| 44 | 0   | 1.75 | 40 | 0.06 |
| 45 | 1   | 0.5  | 10 | 0.09 |

**Table S3.** ANOVA results for the applied FCC experimental design for Isop/Hex.

| Source                                | Sum of Squares | Degree of freedom | Mean Square | F-value | p-value  |
|---------------------------------------|----------------|-------------------|-------------|---------|----------|
| Model                                 | 0.0134         | 6                 | 0.0022      | 34.68   | < 0.0001 |
| X <sub>A</sub> -Ratio polar/non polar | 0.0041         | 1                 | 0.0041      | 63.48   | < 0.0001 |
| X <sub>B</sub> -Time (Vortex)         | 0.0019         | 1                 | 0.0019      | 29.85   | < 0.0001 |
| X <sub>C</sub> -Ratio solid/liquid    | 0.0053         | 1                 | 0.0053      | 82.91   | < 0.0001 |
| X <sub>A</sub> X <sub>B</sub>         | 0.0000         | 1                 | 0.0000      | 0.2591  | 0.6137   |
| X <sub>A</sub> X <sub>C</sub>         | 0.0000         | 1                 | 0.0000      | 0.2591  | 0.6137   |
| X <sub>A</sub> X <sub>C</sub>         | 0.0020         | 1                 | 0.0020      | 31.35   | < 0.0001 |
| Residual                              | 0.0024         | 38                | 0.0001      |         |          |
| Lack of Fit                           | 0.0012         | 8                 | 0.0002      | 3.89    | 0.0030   |
| Pure Error                            | 0.0012         | 30                | 0.0000      |         |          |
| Cor Total                             | 0.0158         | 44                |             |         |          |

SD = 0.0080, R<sup>2</sup> = 0.8456, R<sup>2</sup><sub>adj</sub> = 0.8212, Adequate Precision = 22.1288.

$$L/DB = + 0.032522 + (0.018778 \cdot X_A) + (0.015511 \cdot X_B) - (0.000044 \cdot X_C) + (0.001333 \cdot X_A \cdot X_B) + (0.000056 \cdot X_A \cdot X_C) - (0.000244 \cdot X_B \cdot X_C)$$

**Table S4.** ANOVA results for the applied FCC experimental design for MeOH/AcOEt.

| Source                                | Sum of Squares | Degree of freedom | Mean Square | F-value | p-value  |
|---------------------------------------|----------------|-------------------|-------------|---------|----------|
| Model                                 | 0.0144         | 9                 | 0.0016      | 37.04   | < 0.0001 |
| X <sub>A</sub> -Ratio polar/non polar | 0.0013         | 1                 | 0.0013      | 30.93   | < 0.0001 |
| X <sub>B</sub> -Time (Vortex)         | 0.0003         | 1                 | 0.0003      | 6.26    | 0.0172   |
| X <sub>C</sub> -Ratio solid/liquid    | 0.0051         | 1                 | 0.0051      | 117.60  | < 0.0001 |
| X <sub>A</sub> X <sub>B</sub>         | 4.167E-06      | 1                 | 4.167E-06   | 0.0966  | 0.7577   |
| X <sub>A</sub> X <sub>C</sub>         | 0.0007         | 1                 | 0.0007      | 16.33   | 0.0003   |
| X <sub>B</sub> X <sub>C</sub>         | 0.0000         | 1                 | 0.0000      | 0.8698  | 0.3574   |
| X <sub>A</sub> <sup>2</sup>           | 0.0033         | 1                 | 0.0033      | 76.97   | < 0.0001 |
| X <sub>B</sub> <sup>2</sup>           | 0.0012         | 1                 | 0.0012      | 27.54   | < 0.0001 |
| X <sub>C</sub> <sup>2</sup>           | 0.0001         | 1                 | 0.0001      | 3.25    | 0.0802   |
| Residual                              | 0.0015         | 35                | 0.0000      |         |          |
| Lack of Fit                           | 0.0004         | 5                 | 0.0001      | 2.49    | 0.0533   |
| Pure Error                            | 0.0011         | 30                | 0.0000      |         |          |
| Cor Total                             | 0.0159         | 44                |             |         |          |

SD = 0.0066, R<sup>2</sup> = 0.9050, R<sup>2</sup><sub>adj</sub> = 0.8805, Adequate Precision = 19.9437.

$$L/DB = + 0.049933 + (0.109574 \cdot X_A) + (0.031193 \cdot X_B) - (0.000573 \cdot X_C) + (0.000667 \cdot X_A \cdot X_B) - (0.000361 \cdot X_A \cdot X_C) - (0.000033 \cdot X_B \cdot X_C) - (0.082963 \cdot X_A^2) - (0.007941 \cdot X_B^2) + (4.73251 \cdot 10^{-6} \cdot X_C^2)$$

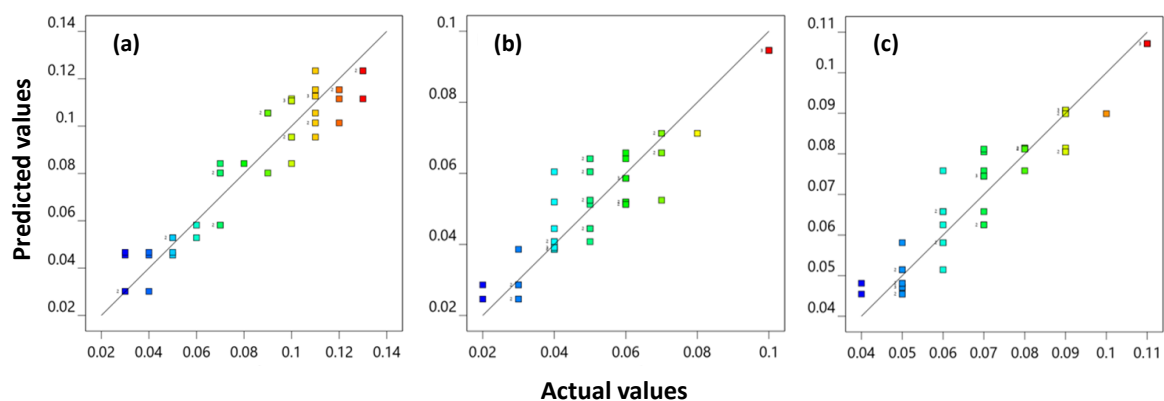

**Figure S1.** Plot of predicted vs. actual values of lipid yield (L/DB, g/g) response for (a) MeOH/Hex; (b) Isop.Hex; and (c) MeOH/AcOEt.

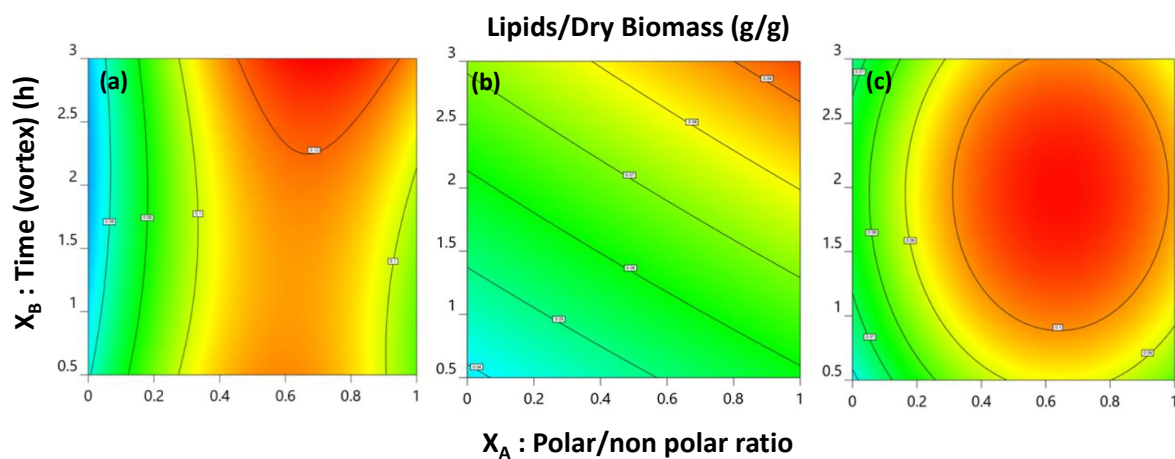

**Figure S2.** Contour plots for lipid yield (L/DB, g/g) response for all types of solvents, (a) MeOH/Hex (dry biomass/solvent ratio = 40); (b) Isop/Hex (dry biomass/solvent ratio = 10); and (c) MeOH/AcOEt (dry biomass/solvent ratio = 10), as a function of polar/non polar ratio ( $X_A$ ) and time of vortex ( $X_B$ ).

**Table S5.** Lipid extraction conditions of validation experiments.

| Type of solvent | Dry biomass/ solvent ratio<br>(mg/mL) | Vortex time (h) | Polar/non-polar<br>ratio |
|-----------------|---------------------------------------|-----------------|--------------------------|
| MeOH/Hex        | 50                                    | 0.75            | 0.33                     |
| Isop/Hex        | 30                                    | 1.50            | 1.00                     |
| MeOH/AcOEt      | 30                                    | 1.25            | 0.60                     |
